# Supplementary material for: Polymerase ε1 mutation in a human syndrome with facial dysmorphism, immunodeficiency, livedo, and short stature (“FILS syndrome”)
Source: PubMed Central journal article supplement — J Exp Med. 2012 Dec 17;209(13):2323–30. doi: 10.1084/jem.20121303 (PMC3526359; doi:10.1084/jem.20121303), 2012-12-17
Supplement: supp_jem.20121303_JEM_20121303_sm.pdf [file supp_jem.20121303_JEM_20121303_sm.pdf]

## SUPPLEMENTAL MATERIAL

Pachlopnik Schmid et al., <http://www.jem.org/cgi/content/full/jem.20121303/DC1>**Table S1.** Immunological features of FILS cases

| Parameter                                                               | Patient ID       |                  |               |                   |                  |           |                   |                  |               |                  |                  |      |       |       |           |               |
|-------------------------------------------------------------------------|------------------|------------------|---------------|-------------------|------------------|-----------|-------------------|------------------|---------------|------------------|------------------|------|-------|-------|-----------|---------------|
|                                                                         | Group 1          |                  |               | Group 2           |                  |           |                   |                  |               | Group 3          |                  |      |       |       |           |               |
|                                                                         | VI-28            | VI-39            | Normal values | VII-2             | VI-38            | VI-29     | VII-1             | VI-36            | Normal values | V-1              | VI-31            | VI-3 | VI-10 | VI-12 | VI-11     | Normal values |
| Age (yr)                                                                | 3                | 6                | 2-6           | 6                 | 8                | 10        | 11                | 12               | 6-12          | 17               | 17               | 23   | 24    | 31    | 33        | 12-adult      |
| Ig level (mg/ml)                                                        |                  |                  |               |                   |                  |           |                   |                  |               |                  |                  |      |       |       |           |               |
| IgM                                                                     | 0.20             | 0.16             | 0.4-1.0       | 0.44              | 0.19             | 0.29      | 0.26              | 0.30             | 0.6-2.1       | 0.22             | 0.08             | 0.32 | 0.23  | 0.34  | 0.44      | 0.6-2.1       |
| IgG                                                                     | 5.3              | 6.2              | 3.5-11.8      | 11.1              | 9.1              | 11.4      | 7.82              | 13               | 4.8-14.0      | 12.5             | N                | 10.0 | 5     | 6.5   | 13.3      | 5.2-12.3      |
| IgA                                                                     | 0.2              | 0.89             | 0.4-1.1       | 1.3               | 0.97             | 2.27      | 1.62              | 0.37             | 0.7-1.9       | 1.95             | 3.95             | 1.43 | 0.76  | 0.87  | 2.70      | 1.16-2.6      |
| Allohemagglutinin titer                                                 | 1:1              | 1:1              | >1:8          | 1:8               | 1:4              | 1:8       | nd                | 1:4              | >1:16         | 1:1              | 1:1              | nd   | nd    | nd    | 1:4       | >1:16         |
| <b>Antibodies after immunization</b>                                    |                  |                  |               |                   |                  |           |                   |                  |               |                  |                  |      |       |       |           |               |
| Anti- <i>S. pneumoniae</i> polysaccharide IgG (µg/ml)                   | 0.8 <sup>a</sup> | 1.0 <sup>a</sup> | >7            | 2.3 <sup>a</sup>  | 0.5 <sup>a</sup> | nd        | 1                 | 0.5 <sup>a</sup> | >7            | 2.4 <sup>a</sup> | 0.3 <sup>a</sup> | nd   | nd    | nd    | nd        | >7            |
| Anti-polio (neutralizing antibodies against poliovirus types 1/2/3)     | >160             | nd               | >5            | 40/160/60         | 80/160/160       | 60/80/160 | 60/160/5          | nd               | >5            | nd               | 20/60/20         | nd   | nd    | nd    | 120/60/10 | >5            |
| Anti-tetanus toxoid (UI/ml)                                             | 2.5              | nd               | >5            | 0.11 <sup>a</sup> | 0.54             | 0.60      | <0.1 <sup>a</sup> | nd               | >5            | nd               | 0.63             | nd   | nd    | nd    | 0.68      | >5            |
| Anti-influenza (µg/ml)                                                  | >1               | nd               | >1            | 1.1               | nd               | nd        | <1                | nd               | >1            | nd               | nd               | nd   | nd    | nd    | nd        | >1            |
| <b>B cell population</b>                                                |                  |                  |               |                   |                  |           |                   |                  |               |                  |                  |      |       |       |           |               |
| B lymphocyte (CD19 <sup>+</sup> ; per µl × 10 <sup>-3</sup> )           | 1.40             | 0.30             | 0.39-1.40     | 0.50              | 0.32             | 0.24      | 0.36              | 0.24             | 0.27-0.86     | 0.20             | 0.25             | 0.21 | nd    | nd    | 0.10      | 0.11-0.57     |
| δ <sup>+</sup> CD27 <sup>+</sup> /CD19 <sup>+</sup> nonswitched (%)     | nd               | 0.5              | 3-4           | 3.3               | 1.8              | 2.5       | 0.9               | 3.3              | 7-15          | nd               | 2.9              | 1    | nd    | nd    | nd        | 7-25          |
| IgM <sup>hi</sup> CD38 <sup>+</sup> /CD19 <sup>+</sup> transitional (%) | nd               | 2                | 2-8           | 4                 | 2.1              | 9.5       | 13                | 3                | 4-8           | nd               | 14               | 13   | nd    | nd    | nd        | 6-11          |
| CD27 <sup>+</sup> /CD19 <sup>+</sup> memory (%)                         | 2                | 2                | >10           | 5                 | 4                | 5         | 2                 | 5                | >10           | 7                | 3                | 2    | nd    | nd    | nd        | >10           |
| δ <sup>-</sup> CD27 <sup>+</sup> /CD19 <sup>+</sup> switched (%)        | 1.9              | 0.7              | 4-10          | 2.2               | 2.2              | 2.4       | 0.6               | 0.1              | 4-18          | nd               | 0.8              | 0.1  | nd    | nd    | nd        | 10-28         |
| Lymphocytes (per µl × 10 <sup>-3</sup> )                                | 4.9              | 2.1              | 2.3-5.4       | 3.1               | 2.3              | 2.6       | 2.4               | 1.6              | 1.9-3.7       | 1.7              | 1.8              | 2    | nd    | nd    | 1.1       | 1.4-3.3       |
| <b>T cell population (%)</b>                                            |                  |                  |               |                   |                  |           |                   |                  |               |                  |                  |      |       |       |           |               |
| CD3 <sup>+</sup>                                                        | 75               | 80               | 56-75         | 75                | 71               | 84        | 81                | 69               | 60-75         | 72               | 75               | 86   | nd    | nd    | 84        | 56-84         |
| CD4 <sup>+</sup>                                                        | 48               | 39               | 28-47         | 45                | 30               | 40        | 49                | 42               | 31-47         | 41               | 38               | 61   | 49    | 25    | 44        | 31-52         |
| CD8 <sup>+</sup>                                                        | 24               | 37               | 16-30         | 26                | 37               | 39        | 24                | 25               | 18-35         | 27               | 31               | 21   | 40    | 49    | 35        | 18-35         |
| CD31 <sup>+</sup> CD45RA <sup>+</sup> /CD4 <sup>+</sup> naive           | nd               | 35               | 50-85         | 60                | nd               | 44        | 47                | 37               | 42-74         | 39               | 23               | 30   | nd    | nd    | 12        | 43-55         |
| <b>T cell proliferation (cpm × 10<sup>-3</sup>)</b>                     |                  |                  |               |                   |                  |           |                   |                  |               |                  |                  |      |       |       |           |               |
| Upon PHA stimulation                                                    | 30               | 2.5              | >50           | 47                | 30               | 41        | 27                | 52               | >50           | 133              | 38               | 64   | 111   | 119   | 33        | >50           |
| Upon tetanus toxoid stimulation                                         | 6                | 9                | >10           | 17                | 8                | 7         | 10                | 1                | >10           | 1                | 10               | nd   | nd    | nd    | 6         | >10           |
| <b>Natural killer cells</b>                                             |                  |                  |               |                   |                  |           |                   |                  |               |                  |                  |      |       |       |           |               |
| CD56 <sup>+</sup> CD16 <sup>+</sup> (per µl × 10 <sup>-3</sup> )        | 0.21             | 0.21             | 0.13-0.72     | 0.34              | 0.25             | 0.15      | 0.08              | 0.18             | 0.10-0.48     | 0.19             | 0.16             | 0.08 | nd    | nd    | 0.01      | 0.07-0.48     |

nd, not done. Patient VI-9 lacks a detailed immunological analysis, and thus was not included in the table.

<sup>a</sup>No increase after immunization.

**Table S2.** *POLE1* primers

| Name           | Primer                       |
|----------------|------------------------------|
| <b>Genomic</b> |                              |
| Exon 1F        | 5'-CAGAGGTGGTAGCCAACG-3'     |
| Exon 1R        | 5'-GTTCCCGCAAAGAAGC-3'       |
| Exon 2+3F      | 5'-CAGAGCAAGACTCCGTCTCA-3'   |
| Exon 2+3R      | 5'-GGGTTTTAGCTGTGCGAGT-3'    |
| Exon 4-6F      | 5'-AGGAGCAAGCAATGTGTTTT-3'   |
| Exon 4-6R      | 5'-CAGAGCCAGCCATTAAGGTA-3'   |
| Exon 7+8F      | 5'-TTTCCTCGGTTTGAAGTCTG-3'   |
| Exon 7+8R      | 5'-TTTACCATGTCCCTTCACT-3'    |
| Exon 9+10F     | 5'-GGCCTAATGGGGAGTTTAGA-3'   |
| Exon 9+10R     | 5'-ACGGTCATACCCTGAGAACA-3'   |
| Exon 11+12F    | 5'-ACTTTGGGAGAGGAATTTGG-3'   |
| Exon 11+12R    | 5'-CCATACTTTGGGTGACCTG-3'    |
| Exon 13+14F    | 5'-TCATCTGGCTTCTGTCTC-3'     |
| Exon 13+14R    | 5'-CTCCTGTGGTTTCTCCTCA-3'    |
| Exon 15+16F    | 5'-ACCACGAGGTTTTCTCTCT-3'    |
| Exon 15+16R    | 5'-ACACAGACTGGCTTCTCTG-3'    |
| Exon 17-19F    | 5'-TGTCTAAAAGGGGTTGGTGA-3'   |
| Exon 17-19R    | 5'-GAGCAGGAGCCACATCTTTA-3'   |
| Exon 20F       | 5'-CTGAGCTGTTGCTCCTTTGT-3'   |
| Exon 20R       | 5'-CCTTTAGGGTCCCTTCTGAGG-3'  |
| Exon 21F       | 5'-ATCTGTGAGGTGCTCCATGT-3'   |
| Exon 21R       | 5'-ACTCTGCAAGTCCCTGAGTG-3'   |
| Exon 22+23F    | 5'-GCATCTCTCCTTCTCCTCCT-3'   |
| Exon 22+23R    | 5'-CTGGGAGCTATGCTGAAAGA-3'   |
| Exon 24+25F    | 5'-TTGTCAATCCATCCACTCCT-3'   |
| Exon 24+25R    | 5'-CCTTCTTGCTTCATCCTCA-3'    |
| Exon 26F       | 5'-GCCTAGAGGAGCAGATCCA-3'    |
| Exon 26R       | 5'-CACTTATGCCATCCCCAAC-3'    |
| Exon 27-29F    | 5'-CACGTCCTTATTTCCATGTTCA-3' |
| Exon 27-29R    | 5'-AAGCCTGGAGTCCGTGTGT-3'    |
| Exon 30+31F    | 5'-AGCCCGAGATCCTGAGATTT-3'   |
| Exon 30+31R    | 5'-CTCCCCTGGATCAAGGTCT-3'    |
| Exon 32F       | 5'-GCAAGCTACCTGGAAGGTG-3'    |
| Exon 32R       | 5'-GGAGGCCAGGCTAGATCAT-3'    |
| Exon 33-35F    | 5'-GCCCAGTGACGAGATCAT-3'     |
| Exon 33-35R    | 5'-TGTCTCCTCCCCAAC-3'        |
| Exon 36-38F    | 5'-TGCTTGTGCGATTGAATTG-3'    |
| Exon 36-38R    | 5'-TCACAGAATGGCAGAAACAC-3'   |
| Exon 39F       | 5'-GTCTGTTGCTGTTCTGGAG-3'    |
| Exon 39R       | 5'-GGACCCTGCTTAGACCTTAGC-3'  |
| Exon 40F       | 5'-ACCTGTGCCATTTAGTT-3'      |
| Exon 40R       | 5'-TTGGATTGTTATGCTCCACA-3'   |
| Exon 41F       | 5'-AGGCTTTCTGCTCAGGAC-3'     |
| Exon 41R       | 5'-CTTTTACGCTGCTCAGATT-3'    |
| Exon 42F       | 5'-GAGGGATGATGTGGTCTGAA-3'   |
| Exon 42R       | 5'-GGTGCAGTGTCTGCTGCT-3'     |
| Exon 43F       | 5'-GATGGACCCAGGTTGGAG-3'     |
| Exon 43R       | 5'-CTGTCTCCCTTCTGCGATA-3'    |

**Table S2.** *POLE1* primers (Continued)

| Name                       | Primer                        |
|----------------------------|-------------------------------|
| Exon 44+45F                | 5'-CCTCATCTGTGAGGCAATCT-3'    |
| Exon 44+45R                | 5'-ATTACAGCCTCACCTTGAC-3'     |
| Exon 46+47F                | 5'-GCCTAAGGTCCAGAGGGTTC-3'    |
| Exon 46+47R                | 5'-TCAGGACCTGCACACACC-3'      |
| Exon 48+49F                | 5'-GCTCGAGGCTTACTGATGG-3'     |
| Exon 48+49R                | 5'-CAGTGGTCTGGTCACTGGA-3'     |
| <b>RT-PCR</b>              |                               |
| cDNA Exons 32-37F          | 5'-TTCTACGTGAACCAGCGAGT-3'    |
| cDNA Exons 32-37R          | 5'-TGGACTGAACAGCGATGAG-3'     |
| <b>Quantitative RT-PCR</b> |                               |
| cDNA Exons 28-29F          | 5'-CGCCATCCAGAAGATCATCA-3'    |
| cDNA Exons 28-29R          | 5'-CACGTGGCACTGGGTTCTTT-3'    |
| probe cDNA Exons 28-29     | 5'-ATCCCTGCGGCCCTGCAGC-3'     |
| cDNA Exons 33-34F          | 5'-GAGGGCGTATATGAGACTCAGGT-3' |
| cDNA Exons 33-34R          | 5'-ACCAGCTGTTTATTGACCACACA-3' |
| probe cDNA Exons 33-34     | 5'-TTCCGGGCCCTGGTGCACC-3'     |
| <b>shRNA</b>               |                               |
| POLE-shRNA F               | 5'-GCAGTGGAATTACTTATT-3'      |
| POLE-shRNA R               | 5'-AATAAAGTAGTAATCCACTGC-3'   |
| Scramble-shRNA F           | 5'-GACTCGGGTAGTTTATGGA-3'     |
| Scramble-shRNA R           | 5'-TCCATAAACTACCCGAGTC-3'     |
